# Supplementary material for: Phenotypes and gene expression profiles of Saccharopolyspora erythraea rifampicin-resistant (rif) mutants affected in erythromycin production
Source: PubMed Central journal article supplement (PMC2667423; doi:10.1186/1475-2859-8-18), 2009-03-30
Supplement: 1475-2859-8-18-S1.pdf [file 1475-2859-8-18-S1.pdf]

**Table S1.** Functional categories significantly enriched or depleted in the 198 phase **a** and 270 phase **b** differentially expressed genes (DEGs)<sup>a</sup>

| Functional categories                                              | COG          | Total probesets | Total %     | DEG Phase A | Phase A %    | DEG Phase B | Phase B %   |
|--------------------------------------------------------------------|--------------|-----------------|-------------|-------------|--------------|-------------|-------------|
| <b>I. Cellular processes and signalling</b>                        |              |                 |             |             |              |             |             |
| Cell cycle control, cell division, chromosome partitioning         | I.1          | 25              | 0.38        | 0           | 0.00         | 2           | 0.74        |
| Cell motility                                                      | I.2          | 1               | 0.02        | 0           | 0.00         | 0           | 0.00        |
| <i>Cell wall/membrane/envelope biogenesis</i>                      | <i>I.3</i>   | <i>145</i>      | <i>2.23</i> | <i>2</i>    | <i>1.01</i>  | 5           | 1.85        |
| Defense mechanisms                                                 | I.4          | 63              | 0.97        | 1           | 0.51         | 2           | 0.74        |
| Intracellular trafficking, secretion, and vesicular transport      | I.5          | 17              | 0.26        | 1           | 0.51         | 0           | 0.00        |
| Posttranslational modification, protein turnover, chaperones       | I.6          | 134             | 2.06        | 7           | 3.54         | 7           | 2.59        |
| Signal transduction mechanisms                                     | I.7          | 135             | 2.08        | 3           | 1.52         | 3           | 1.11        |
| <b>II. Information storage and processing</b>                      |              |                 |             |             |              |             |             |
| Amino acid transport and metabolism                                | II.1         | 1               | 0.02        | 0           | 0.00         | 0           | 0.00        |
| Cell wall/membrane/envelope biogenesis                             | II.2         | 1               | 0.02        | 0           | 0.00         | 0           | 0.00        |
| Chromatin structure and dynamics                                   | II.3         | 1               | 0.02        | 0           | 0.00         | 0           | 0.00        |
| General function prediction only                                   | II.4         | 21              | 0.32        | 1           | 0.51         | 0           | 0.00        |
| Nucleotide transport and metabolism                                | II.5         | 5               | 0.08        | 0           | 0.00         | 0           | 0.00        |
| <b>Posttranslational modification, protein turnover, chaperone</b> | <b>II.6</b>  | <b>3</b>        | <b>0.05</b> | <b>2</b>    | <b>1.01</b>  | 0           | 0.00        |
| Replication, recombination and repair                              | II.7         | 172             | 2.65        | 6           | 3.03         | 4           | 1.48        |
| <b>RNA processing and modification</b>                             | <b>II.8</b>  | <b>1</b>        | <b>0.02</b> | <b>1</b>    | <b>0.51</b>  | 0           | 0.00        |
| Secondary metabolites biosynthesis, transport catabolism           | II.9         | 3               | 0.05        | 0           | 0.00         | 0           | 0.00        |
| Signal transduction mechanisms                                     | II.10        | 50              | 0.77        | 1           | 0.51         | 0           | 0.00        |
| Transcription                                                      | II.11        | 508             | 7.82        | 8           | 4.04         | 12          | 4.44        |
| <b>Translation, ribosomal structure and biogenesis</b>             | <b>II.12</b> | <b>175</b>      | <b>2.69</b> | <b>12</b>   | <b>6.06</b>  | <b>15</b>   | <b>5.56</b> |
| <b>III. Metabolism</b>                                             |              |                 |             |             |              |             |             |
| Amino acid transport and metabolism                                | III.1        | 466             | 7.18        | 18          | 9.09         | 19          | 7.04        |
| <i>Carbohydrate transport and metabolism</i>                       | <i>III.2</i> | <i>429</i>      | <i>6.61</i> | <i>6</i>    | <i>3.03</i>  | 21          | 7.78        |
| Cell wall/membrane/envelope biogenesis                             | III.3        | 27              | 0.42        | 1           | 0.51         | 0           | 0.00        |
| Coenzyme transport and metabolism                                  | III.4        | 186             | 2.86        | 7           | 3.54         | 7           | 2.59        |
| <b>Energy production and conversion</b>                            | <b>III.5</b> | <b>338</b>      | <b>5.20</b> | <b>22</b>   | <b>11.11</b> | 27          | 10.00       |
| Inorganic ion transport and metabolism                             | III.6        | 189             | 2.91        | 10          | 5.05         | 5           | 1.85        |
| Lipid transport and metabolism                                     | III.7        | 299             | 4.60        | 6           | 3.03         | 11          | 4.07        |
| <b>Nucleotide transport and metabolism</b>                         | <b>III.8</b> | <b>90</b>       | <b>1.39</b> | <b>10</b>   | <b>5.05</b>  | 3           | 1.11        |
| Posttranslational modification, protein turnover, chaperones       | III.9        | 6               | 0.09        | 0           | 0.00         | 0           | 0.00        |
| <i>Secondary metabolites biosynthesis, transport catabolism</i>    | III.10       | 205             | 3.16        | 0           | 0.00         | <i>2</i>    | <i>0.74</i> |
| Signal transduction mechanisms                                     | III.11       | 11              | 0.17        | 0           | 0.00         | 0           | 0.00        |
| <b>IV. Poorly characterized</b>                                    |              |                 |             |             |              |             |             |
| Function unknown                                                   | IV.1         | 2267            | 34.91       | 65          | 32.83        | 103         | 38.15       |
| General function prediction only                                   | IV.2         | 520             | 8.01        | 8           | 4.04         | 22          | 8.15        |

<sup>a</sup>The total of the ORFs targeted by the 6494 probe-sets analyzed, and the 198 phase **a** and 270 phase **b** differentially expressed genes, have been divided into functional categories and the enrichment or depletion of some of them was evidenced. For each functional category  
**BOLD-red** = enrichment= % (DEG Phase A or DEG Phase B)>2\*% (total probe-sets)  
*ITALIC-green* = depletion= % (DEG Phase A or DEG Phase B)<2\*% (total probe-sets)

**Table S2.** Phase a: 122 differentially expressed genes belonging to cluster 1 (up-regulated in rif6).

| Probe-set ID | Functional category | Gene name and Product description                                           |
|--------------|---------------------|-----------------------------------------------------------------------------|
| SACE_1966    | I.3                 | ---, hypothetical protein                                                   |
| SACE_7138    | I.3                 | ---, lysozyme M1 precursor                                                  |
| SACE_2146    | I.5                 | ---, preprotein translocase SecG subunit                                    |
| SACE_0034    | I.6                 | ---, putative peptidyl-prolyl cis-trans isomerase                           |
| SACE_1108    | I.6                 | smpB, SsrA-binding protein                                                  |
| SACE_2251    | I.6                 | prcB, 20S proteasome beta-subunit precursor                                 |
| SACE_3845    | I.7                 | ---, FHA domain containing protein                                          |
| SACE_2443    | I.7                 | uspA3, universal stress protein family                                      |
| SACE_1682    | I.7                 | ---, putative two-component system response regulator                       |
| SACE_7101    | II.10               | glnR, transcriptional regulator                                             |
| SACE_2101    | II.11               | ---, DNA-directed RNA polymerase subunit omega                              |
| SACE_4349    | II.11               | ---, transcriptional regulator, GntR family                                 |
| SACE_4481    | II.11               | ---, transcriptional regulator, ArsR family                                 |
| SACE_3299    | II.11               | ---, probable transcriptional regulator, MarR family                        |
| SACE_5148    | II.11               | ---, GCN5-related N-acetyltransferase                                       |
| SACE_1104    | II.11               | ---, possible transcriptional regulator, PadR family                        |
| SACE_5431    | II.12               | rpsA, 30S ribosomal protein S1                                              |
| SACE_6443    | II.12               | ---, S30AE family protein                                                   |
| SACE_6690    | II.4                | ---, putative serine/threonine protein kinase                               |
| SACE_0638    | II.6                | ureG, urease accessory protein                                              |
| SACE_1292    | II.8                | ornA, oligoribonuclease (3'→5' exoribonuclease)                             |
| SACE_0784    | III.1               | lat, L-lysine-epsilon aminotransferase                                      |
| SACE_1013    | III.1               | dapD, 2,3,4,5-tetrahydropyridine-2,6-dicarboxylate N-succinyltransferase    |
| SACE_5756    | III.1               | hisF, imidazoleglycerol-phosphate synthase cyclase                          |
| SACE_1623    | III.1               | glnA-1, glutamine synthetase                                                |
| SACE_0634    | III.1               | ureA, urease gamma subunit protein                                          |
| SACE_5263    | III.1               | ---, N-acetyl-gamma-glutamyl-phosphate reductase                            |
| SACE_0636    | III.1               | ureC, urease alpha subunit                                                  |
| SACE_6061    | III.1               | glnB, nitrogen regulatory protein PII                                       |
| SACE_0217    | III.1               | hisC2, putative histidinol-phosphate aminotransferase                       |
| SACE_6995    | III.1               | ---, N-succinyldiaminopimelate aminotransferase                             |
| SACE_3898    | III.1               | methH, putative 5-methyltetrahydrofolate:homocysteine S-methyltransferase   |
| SACE_4093    | III.1               | gudB, NAD-specific glutamate dehydrogenase                                  |
| SACE_1978    | III.1               | ---, proline dehydrogenase                                                  |
| SACE_0838    | III.2               | eno, phosphopyruvate hydratase                                              |
| SACE_6189    | III.2               | ebrB, multidrug resistance efflux protein                                   |
| SACE_3945    | III.2               | ---, metabolite transporter, MFS superfamily                                |
| SACE_0625    | III.2               | ---, drug resistance transporter, Bcr/CflA family                           |
| SACE_1584    | III.2               | ---, putative bifunctional protein (ribonuclease H/phosphoglycerate mutase) |
| SACE_4546    | III.3               | ---, secreted protein                                                       |
| SACE_2009    | III.4               | pdx1, putative pyridoxine biosynthesis protein                              |
| SACE_0400    | III.4               | folK, 2-amino-4-hydroxy-6-hydroxymethylidihydropteridine pyrophosphokinase  |
| SACE_1636    | III.4               | lipB, lipoate-protein ligase B                                              |
| SACE_3804    | III.4               | ---, uroporphyrinogen-III synthetase                                        |
| SACE_6888    | III.4               | ---, polyprenyl diphosphate synthase component                              |
| SACE_2830    | III.5               | ---, probable Na <sup>(+)</sup> /glutamate:H <sup>(+)</sup> symporter       |
| SACE_5674    | III.5               | ---, pyruvate dehydrogenase complex dihydrolipoamide acetyltransferase      |
| SACE_1684    | III.5               | ctaE, cytochrome c oxidase subunit III                                      |

|           |       |                                                                                    |
|-----------|-------|------------------------------------------------------------------------------------|
| SACE_1685 | III.5 | qcrC, cytochrome c mono-and diheme variants                                        |
| SACE_5675 | III.5 | ---, dehydrogenase complex, E1 component, beta subunit                             |
| SACE_1686 | III.5 | ---, probable ubiquinol-cytochrome c reductase iron-sulfur subunit                 |
| SACE_6284 | III.5 | atpF, ATP synthase B chain                                                         |
| SACE_6280 | III.5 | atpD, ATP synthase beta chain                                                      |
| SACE_3674 | III.5 | mdh, malate dehydrogenase                                                          |
| SACE_0195 | III.5 | ---, probable FAD linked oxidoreductase                                            |
| SACE_3802 | III.5 | nirB, nitrite reductase (NAD(P)H) large subunit                                    |
| SACE_3801 | III.5 | nirB, assimilatory nitrite reductase large subunit                                 |
| SACE_3800 | III.5 | ---, assimilatory nitrate reductase catalytic subunit                              |
| SACE_6062 | III.6 | amt, ammonium transporter                                                          |
| SACE_4973 | III.6 | ---, ferritin family protein                                                       |
| SACE_3799 | III.6 | narK, nitrite extrusion protein                                                    |
| SACE_5235 | III.6 | ---, TrkA-C domain protein                                                         |
| SACE_3803 | III.6 | nirD, nitrite reductase (NAD(P)H) small subunit                                    |
| SACE_6539 | III.6 | ---, probable multisubunit Na <sup>+</sup> :H <sup>+</sup> antiporter MnhG subunit |
| SACE_1694 | III.7 | ---, putative long-chain fatty acid ligase                                         |
| SACE_7125 | III.8 | purF, amidophosphoribosyltransferase                                               |
| SACE_6812 | III.8 | adk, adenylate kinase                                                              |
| SACE_7189 | III.8 | pyrE, orotate phosphoribosyltransferase                                            |
| SACE_1461 | III.8 | ---, guanine-specific ribonuclease N1 and T1                                       |
| SACE_3612 | III.8 | add, adenosine deaminase                                                           |
| SACE_6727 | III.8 | ---, allantoinase                                                                  |
| SACE_1282 | III.8 | nrdB, ribonucleoside-diphosphate reductase, beta subunit                           |
| SACE_0335 | IV.1  | ---, protein of unknown function DUF1469                                           |
| SACE_5395 | IV.1  | ---, hypothetical protein                                                          |
| SACE_0067 | IV.1  | ---, hypothetical protein                                                          |
| SACE_0208 | IV.1  | ---, hypothetical protein                                                          |
| SACE_2051 | IV.1  | ---, hypothetical protein                                                          |
| SACE_6128 | IV.1  | ---, putative transcriptional regulator, AsnC family                               |
| SACE_1577 | IV.1  | ---, hypothetical protein                                                          |
| SACE_1955 | IV.1  | ---, hypothetical protein                                                          |
| SACE_1394 | IV.1  | ---, hypothetical protein                                                          |
| SACE_2077 | IV.1  | ---, putative transcriptional regulator (DNA-binding protein)                      |
| SACE_0033 | IV.1  | ---, hypothetical protein                                                          |
| SACE_0865 | IV.1  | ---, hypothetical protein                                                          |
| SACE_1895 | IV.1  | ---, transcriptional regulator, XRE family                                         |
| SACE_0801 | IV.1  | ---, transglycosylase-like protein                                                 |
| SACE_4318 | IV.1  | ---, hypothetical protein                                                          |
| SACE_6787 | IV.1  | ---, hypothetical protein                                                          |
| SACE_5834 | IV.1  | ---, hypothetical protein                                                          |
| SACE_7176 | IV.1  | ---, hypothetical protein                                                          |
| SACE_6957 | IV.1  | ---, hypothetical protein                                                          |
| SACE_1697 | IV.1  | ---, cyclase/dehydrase                                                             |
| SACE_2471 | IV.1  | ---, hypothetical protein                                                          |
| SACE_1396 | IV.1  | ---, hypothetical protein                                                          |
| SACE_5698 | IV.1  | ---, hypothetical protein                                                          |
| SACE_1340 | IV.1  | ---, DsbA oxidoreductase                                                           |
| SACE_1295 | IV.1  | ---, hypothetical protein                                                          |
| SACE_6428 | IV.1  | ---, biotin/lipoyl attachment                                                      |
| SACE_6926 | IV.1  | ---, excisionase/Xis, DNA-binding                                                  |
| SACE_6556 | IV.1  | ---, hypothetical protein                                                          |
| SACE_3805 | IV.1  | ---, chalcone/stilbene synthase family protein                                     |
| SACE_5214 | IV.1  | ---, hypothetical protein                                                          |

|           |      |                                                                     |
|-----------|------|---------------------------------------------------------------------|
| SACE_6241 | IV.1 | ---, M protein                                                      |
| SACE_3841 | IV.1 | ---, hypothetical protein                                           |
| SACE_1460 | IV.1 | ---, hypothetical protein                                           |
| SACE_6574 | IV.1 | ---, hypothetical protein                                           |
| SACE_3736 | IV.1 | ---, hypothetical protein                                           |
| SACE_6608 | IV.1 | ---, regulator                                                      |
| SACE_7071 | IV.1 | ---, hypothetical protein                                           |
| SACE_0081 | IV.1 | ---, hypothetical protein                                           |
| SACE_2475 | IV.1 | ---, multicopper oxidase type 1                                     |
| SACE_6397 | IV.1 | ---, DGPF domain protein                                            |
| SACE_2554 | IV.1 | ---, possible transcriptional regulator                             |
| SACE_6426 | IV.1 | whiB1, putative transcriptional regulator (WhiB family)             |
| SACE_5515 | IV.1 | ---, hypothetical protein                                           |
| SACE_6989 | IV.1 | tolA, membrane spanning protein                                     |
| SACE_1754 | IV.2 | hflX, GTP-binding protein                                           |
| SACE_7048 | IV.2 | ---, 2,5-diketo-D-gluconic acid reductase                           |
| SACE_3559 | IV.2 | ---, pyridoxamine 5'-phosphate oxidase-related, FMN-binding protein |
| SACE_0428 | IV.2 | ---, antibiotic biosynthesis monooxygenase                          |
| SACE_1331 | IV.2 | glbO, hemoglobin-like, oxygen carrier                               |
| SACE_5733 | IV.2 | ---, possible glycosyltransferase                                   |

**Table S3.** Phase a: 36 differentially expressed genes belonging to cluster 2 (down-regulated in rif6).

| Probe-set ID | Functional category | Gene name and Product description                                |
|--------------|---------------------|------------------------------------------------------------------|
| SACE_4615    | I.4                 | ---, putative ATP-binding component of an ABC transport protein  |
| SACE_0341    | II.11               | ptlR, AraC-family transcriptional regulator                      |
| SACE_0542    | II.11               | ---, transcriptional regulator, XRE family                       |
| SACE_2691    | II.12               | ---, methionyl-tRNA formyltransferase                            |
| SACE_5243    | II.7                | nudF, ADP-ribose pyrophosphatase                                 |
| SACE_2336    | II.7                | ---, DNA polymerase III alpha subunit (fragment)                 |
| SACE_0848    | III.1               | ---, oligopeptide ABC transporter ATP-binding protein            |
| SACE_0847    | III.1               | ---, oligopeptide ABC transporter ATP-binding protein            |
| SACE_6157    | III.1               | ilvC, ketol-acid reductoisomerase                                |
| SACE_0508    | III.4               | thiG, thiamine synthesis, thiazole moiety                        |
| SACE_6902    | III.5               | nuoA, NADH dehydrogenase I chain A                               |
| SACE_6891    | III.5               | nuoL, NADH dehydrogenase I chain L                               |
| SACE_3507    | III.5               | ---, probable CoB--CoM heterodisulfide reductase                 |
| SACE_1549    | III.6               | ---, hypothetical protein                                        |
| SACE_7096    | III.6               | pstB, putative phosphate transport ATP-binding protein           |
| SACE_7106    | III.6               | cysA3, thiosulfate sulfurtransferase                             |
| SACE_0982    | III.6               | ---, ABC transporter integral membrane protein                   |
| SACE_0440    | III.7               | ispF, 2-C-methyl-D-erythritol 2,4-cyclodiphosphate synthase      |
| SACE_0337    | III.7               | acsA, acetyl-coenzyme A synthetase                               |
| SACE_4132    | III.7               | ---, acyl carrier protein                                        |
| SACE_6485    | III.8               | purE, phosphoribosylaminoimidazole carboxylase catalytic subunit |
| SACE_6036    | III.8               | pyrH, uridylyate kinase                                          |
| SACE_0874    | IV.1                | ---, hypothetical protein                                        |
| SACE_7080    | IV.1                | ---, hypothetical protein                                        |
| SACE_6471    | IV.1                | vrrB, hypervariable Bacillus group-specific protein              |
| SACE_4465    | IV.1                | ---, hypothetical protein                                        |
| SACE_0197    | IV.1                | ---, hypothetical protein                                        |
| SACE_5903    | IV.1                | ---, hypothetical protein                                        |
| SACE_4561    | IV.1                | ---, FAD dependent oxidoreductase                                |
| SACE_2972    | IV.1                | ---, hypothetical protein                                        |
| SACE_6652    | IV.1                | ---, protein of unknown function DUF606                          |
| SACE_1101    | IV.1                | ---, hypothetical protein                                        |
| SACE_0256    | IV.1                | ---, hypothetical protein                                        |
| SACE_1735    | IV.1                | ---, hypothetical protein                                        |
| SACE_1131    | IV.1                | ---, hypothetical protein                                        |
| SACE_3626    | IV.2                | ---, alpha/beta hydrolase fold                                   |

**Table S4. Phase a:** 27 differentially expressed genes belonging to cluster 3 (strongly down-regulated in rif 6, moderately down-regulated in rif1).

| Probe-set ID | Functional category | Gene name and Product description                                                               |
|--------------|---------------------|-------------------------------------------------------------------------------------------------|
| SACE 7210    | I.6                 | dnaK, 70 kD heat shock protein (molecular chaperone)                                            |
| SACE 5971    | I.6                 | ---, secreted trypsin-like serine protease                                                      |
| SACE 1359    | I.6                 | tig, putative cell division trigger factor                                                      |
| SACE 5683    | I.6                 | ---, DsbA-like thioredoxin domain protein                                                       |
| SACE 6828    | II.12               | rpmC, 50S ribosomal protein L29                                                                 |
| SACE 6818    | II.12               | rpmD, 50S ribosomal protein L30                                                                 |
| SACE 5914    | II.12               | ---, putative guanosine pentaphosphate synthetase and polyribonucleotide nucleotidyltransferase |
| SACE 6804    | II.12               | rpsD, 30S ribosomal protein S4                                                                  |
| SACE 6835    | II.12               | rplD, 50S ribosomal protein L4                                                                  |
| SACE 6834    | II.12               | rplW, 50S ribosomal protein L23                                                                 |
| SACE 6038    | II.12               | rpsB, 30S ribosomal protein S2                                                                  |
| SACE 6817    | II.12               | rplO, 50S ribosomal protein L15                                                                 |
| SACE 6300    | II.12               | argS, arginyl-tRNA synthetase                                                                   |
| SACE 6058    | II.7                | deaD, ATP-dependent RNA helicase                                                                |
| SACE 0009    | II.7                | gyrA, DNA gyrase subunit A                                                                      |
| SACE 0008    | II.7                | gyrB, DNA gyrase subunit B                                                                      |
| SACE 5942    | II.7                | ---, ATP-dependent RNA helicase                                                                 |
| SACE 2160    | III.2               | tkt, transketolase                                                                              |
| SACE 1837    | III.4               | hemG, protoporphyrinogen oxidase                                                                |
| SACE 6585    | III.5               | sdhB, succinate dehydrogenase iron-sulfur protein                                               |
| SACE 7143    | III.8               | purQ, phosphoribosylformylglycinamide synthase I                                                |
| SACE 3214    | IV.1                | ---, hypothetical protein                                                                       |
| SACE 6975    | IV.1                | ---, ErfK/YbiS/YcfS/YnhG                                                                        |
| SACE 1219    | IV.1                | ---, transcriptional regulator, XRE family                                                      |
| SACE 5747    | IV.1                | ---, hypothetical protein                                                                       |
| SACE 1448    | IV.1                | ---, transcriptional regulator, XRE family                                                      |
| SACE 2657    | IV.1                | ---, hypothetical protein                                                                       |

**Table S5.** Phase a: 13 differentially expressed genes belonging to cluster 4 (up-regulated in rif1, down-regulated in rif 6).

| <b>Probe-set ID</b> | <b>Functional category</b> | <b>Gene name and Product description</b>                     |
|---------------------|----------------------------|--------------------------------------------------------------|
| SACE_2524           | II.6                       | ureG, urease accessory protein                               |
| SACE_1987           | III.1                      | ---, amino acid permease-associated region                   |
| SACE_2526           | III.1                      | ureC, urease alpha subunit                                   |
| SACE_6900           | III.5                      | nuoC, putative NADH dehydrogenase chain C                    |
| SACE_6897           | III.5                      | nuoF, NADH dehydrogenase I chain F                           |
| SACE_6898           | III.5                      | nuoE, putative NADH dehydrogenase chain E                    |
| SACE_6899           | III.5                      | nuoD, NADH dehydrogenase I chain D                           |
| SACE_1456           | III.5                      | mmsA2, methylmalonate-semialdehyde dehydrogenase (acylating) |
| SACE_3052           | III.7                      | ---, medium-chain acyl-CoA ligase                            |
| SACE_1457           | III.7                      | ---, acyl-CoA dehydrogenase-like                             |
| SACE_1553           | IV.1                       | ---, hypothetical protein                                    |
| SACE_0177           | IV.1                       | ---, transcriptional regulator, XRE family                   |
| SACE_1550           | IV.2                       | ---, LamB/YcsF                                               |

**Table S6.** Phase b: 60 differentially expressed genes belonging to cluster 1 (up-regulated in rif1).

| Probe-set ID | Functional category | Gene name and Product description                                                      |
|--------------|---------------------|----------------------------------------------------------------------------------------|
| SACE_5921    | I.4                 | dinF, DNA-damage-inducible protein F                                                   |
| SACE_1844    | II.11               | ---, transcriptional regulator, XRE family                                             |
| SACE_0016    | II.11               | ---, transcriptional regulator, LuxR family                                            |
| SACE_1609    | II.11               | helZ, probable helicase, Snf2/Rad54 family                                             |
| SACE_6589    | II.11               | ydeS, similar to transcriptional regulator (TetR/AcrR family)                          |
| SACE_3836    | II.11               | ---, acetyltransferase                                                                 |
| SACE_2964    | II.11               | ---, transcriptional regulator, GntR family                                            |
| SACE_5885    | II.11               | ---, putative TetR family transcriptional regulator                                    |
| SACE_2113    | II.12               | fmt, methionyl-tRNA formyltransferase                                                  |
| SACE_3651    | II.7                | tnpA, Tn5045 transposase                                                               |
| SACE_1757    | II.7                | ---, IS1533 transposase                                                                |
| SACE_0327    | II.7                | dnaN, DNA polymerase III beta subunit                                                  |
| SACE_5586    | III.1               | ---, Zn-binding alcohol dehydrogenase                                                  |
| SACE_3404    | III.1               | ---, serine/threonine dehydratase                                                      |
| SACE_5755    | III.1               | hisI, putative phosphoribosyl-AMP cyclohydrolase                                       |
| SACE_4556    | III.2               | ---, HpcH/HpaI aldolase                                                                |
| SACE_6531    | III.2               | eryA, putative erythritol kinase protein                                               |
| SACE_4685    | III.4               | bioF, 8-amino-7-oxononanoate synthase                                                  |
| SACE_4394    | III.4               | menG, S-adenosylmethionine: 2-demethylmenaquinone methyltransferase protein            |
| SACE_5965    | III.4               | chlI, putative magnesium-chelatase subunit                                             |
| SACE_2788    | III.5               | ---, monooxygenase, NtaA/SnaA/SoxA family                                              |
| SACE_2405    | III.5               | ---, probable pyruvate dehydrogenase, E2 component, dihydrolipoamide acetyltransferase |
| SACE_6645    | III.6               | ---, phosphonate-binding protein                                                       |
| SACE_3153    | III.7               | ---, AMP-dependent synthetase and ligase                                               |
| SACE_5538    | III.7               | fabF, 3-oxoacyl-[acyl-carrier-protein] synthase                                        |
| SACE_4705    | III.7               | ---, short-chain dehydrogenase/reductase SDR                                           |
| SACE_3857    | III.7               | fadD36, acyl-CoA synthase                                                              |
| SACE_4456    | IV.1                | ---, hypothetical protein                                                              |
| SACE_2528    | IV.1                | ---, hypothetical protein                                                              |
| SACE_1800    | IV.1                | ---, hypothetical protein                                                              |
| SACE_2731    | IV.1                | ---, hypothetical protein                                                              |
| SACE_7006    | IV.1                | ---, secreted protein                                                                  |
| SACE_1128    | IV.1                | ---, hypothetical protein                                                              |
| SACE_2856    | IV.1                | ---, possible secreted protein                                                         |
| SACE_3324    | IV.1                | ---, hypothetical protein                                                              |
| SACE_0550    | IV.1                | ---, hypothetical protein                                                              |
| SACE_1211    | IV.1                | ---, hypothetical protein                                                              |
| SACE_0961    | IV.1                | ---, possible suppressor protein DnaK                                                  |
| SACE_1345    | IV.1                | ---, hypothetical protein                                                              |
| SACE_2570    | IV.1                | ---, hypothetical protein                                                              |
| SACE_4528    | IV.1                | ---, hypothetical protein                                                              |
| SACE_3121    | IV.1                | ---, hypothetical protein                                                              |
| SACE_4426    | IV.1                | ---, hypothetical protein                                                              |
| SACE_6164    | IV.1                | ---, hypothetical protein                                                              |
| SACE_3987    | IV.1                | ---, hypothetical protein                                                              |
| SACE_5911    | IV.1                | ---, tetratricopeptide TPR_2 repeat protein                                            |
| SACE_5418    | IV.1                | ---, hypothetical protein                                                              |



|           |      |                                                               |
|-----------|------|---------------------------------------------------------------|
| SACE_3368 | IV.1 | ---, methylated-DNA-(protein)-cysteine S-methyltransferase    |
| SACE_1888 | IV.1 | ---, putative conserved alanine rich lipoprotein LppW         |
| SACE_1663 | IV.1 | ---, exo-alpha-sialidase                                      |
| SACE_1141 | IV.1 | ---, transcriptional regulator, XRE family                    |
| SACE_6577 | IV.2 | ---, putative sugar ABC transporter integral membrane protein |
| SACE_5333 | IV.2 | ---, putative oxidoreductase                                  |
| SACE_4107 | IV.2 | ---, putative helicase                                        |
| SACE_6744 | IV.2 | blaB2, metallo-beta-lactamase                                 |
| SACE_2505 | IV.2 | ---, peptidase M50                                            |
| SACE_7050 | IV.2 | ---, putative ATP/GTP-binding protein                         |
| SACE_3929 | IV.2 | lipB, yfiP, lipase                                            |
| SACE_6413 | IV.2 | ---, methyltransferases-like                                  |
| SACE_2148 | IV.2 | ---, amidohydrolase family protein                            |

**Table S7.** Phase b: 8 differentially expressed genes belonging to cluster 2 (up-regulated in rif1 and rif 6).

| Probe-set ID | Functional category | Gene name and Product description                  |
|--------------|---------------------|----------------------------------------------------|
| SACE 6340    | I.6                 | ---, trypsin-like serine protease                  |
| SACE 3811    | III.5               | acn, aconitate hydratase                           |
| SACE 3801    | III.5               | nirB, assimilatory nitrite reductase large subunit |
| SACE 5677    | III.5               | pdhD, dihydrolipoamide dehydrogenase               |
| SACE 2477    | III.5               | ---, phthalate 4,5-dioxygenase reductase subunit   |
| SACE 0130    | III.6               | ---, ferritin family protein                       |
| SACE 2305    | IV.1                | ---, hypothetical protein                          |
| SACE 0474    | IV.1                | ---, hypothetical protein                          |

**Table S8.** Phase b: 22 differentially expressed genes belonging to cluster 3 (up-regulated in rif6).

| Probe-set ID | Functional category | Gene name and Product description                     |
|--------------|---------------------|-------------------------------------------------------|
| SACE 1106    | I.1                 | ftsE, cell division ATP-binding protein               |
| SACE 2469    | I.6                 | ---, DsbA oxidoreductase                              |
| SACE 0527    | I.6                 | groL2, 60 kDa chaperonin GroEL                        |
| SACE 6714    | I.6                 | groEL1, 60 kD chaperonin cpn60                        |
| SACE 1414    | II.12               | rplU, 50S ribosomal protein L21                       |
| SACE 0636    | III.1               | ureC, urease alpha subunit                            |
| SACE 0634    | III.1               | ureA, urease gamma subunit protein                    |
| SACE 7201    | III.2               | ---, integral membrane transport protein              |
| SACE 0201    | III.2               | ---, ABC-type transporter, permease component         |
| SACE 7051    | III.4               | ---, putative salicylate monooxygenase                |
| SACE 3802    | III.5               | nirB, nitrite reductase (NAD(P)H) large subunit       |
| SACE 6636    | III.5               | icd-2, isocitrate dehydrogenase, NADP-dependent       |
| SACE 3800    | III.5               | ---, assimilatory nitrate reductase catalytic subunit |
| SACE 6668    | III.5               | ---, succinyl-coa synthetase alpha chain              |
| SACE 6669    | III.5               | sucC, putative succinyl-CoA synthetase beta subunit   |
| SACE 3674    | III.5               | mdh, malate dehydrogenase                             |
| SACE 3799    | III.6               | narK, nitrite extrusion protein                       |
| SACE 4231    | IV.1                | ---, hypothetical protein                             |
| SACE 2475    | IV.1                | ---, multicopper oxidase type 1                       |
| SACE 2471    | IV.1                | ---, hypothetical protein                             |
| SACE 2474    | IV.1                | copC, putative integral membrane protein              |
| SACE 0772    | IV.1                | ---, hypothetical protein                             |

**Table S9.** Phase b: 63 differentially expressed genes belonging to cluster 4 (down-regulated in rif1).

| Probe-set ID | Functional category | Gene name and Product description                              |
|--------------|---------------------|----------------------------------------------------------------|
| SACE_6130    | I.3                 | ddl, D-alanylalanine synthetase                                |
| SACE_2525    | I.6                 | ureF, urease accessroy protein                                 |
| SACE_3845    | I.7                 | ---, FHA domain containing protein                             |
| SACE_1988    | I.7                 | ---, universal stress protein UspA                             |
| SACE_0408    | II.11               | ---, putative Bordetella pertussis Bvg accessory factor family |
| SACE_6833    | II.12               | rplB, 50S ribosomal protein L2                                 |
| SACE_6818    | II.12               | rpmD, 50S ribosomal protein L30                                |
| SACE_6828    | II.12               | rpmC, 50S ribosomal protein L29                                |
| SACE_6823    | II.12               | rpsN, 30S ribosomal protein S14                                |
| SACE_6808    | II.12               | infA, translation initiation factor IF1                        |
| SACE_6830    | II.12               | rpsC, 30S ribosomal protein S3                                 |
| SACE_6832    | II.12               | rpsS, 30S ribosomal protein S19                                |
| SACE_6837    | II.12               | rpsJ, rpsX, 30S ribosomal protein S10                          |
| SACE_6806    | II.12               | rpsM, 30S ribosomal protein S13                                |
| SACE_6142    | II.7                | ---, histone-like DNA binding protein                          |
| SACE_3254    | III.1               | ---, amino acid permease-associated region                     |
| SACE_5669    | III.1               | ---, amino acid transporter, APC family                        |
| SACE_0718    | III.10              | eryCVI, TDP-desosamine-N-dimethyltransferase                   |
| SACE_1047    | III.2               | ---, ABC sugar transporter, permease component                 |
| SACE_5203    | III.2               | iolF, yxdF, inositol transport protein                         |
| SACE_1945    | III.2               | ---, metabolite transporter, MFS superfamily                   |
| SACE_5454    | III.2               | ---, multiple sugar transport system permease protein          |
| SACE_2544    | III.2               | proP, proline/betaine transporter                              |
| SACE_0345    | III.2               | ---, anion/cation symporter, MFS superfamily                   |
| SACE_5950    | III.4               | cobK, precorrin-6A reductase                                   |
| SACE_6889    | III.5               | nuoN, NADH dehydrogenase I chain N                             |
| SACE_1678    | III.5               | ctaC, putative cytochrome c oxidase chain II                   |
| SACE_0939    | III.7               | ---, 4-hydroxy-3-methylbut-2-enyl diphosphate reductase        |
| SACE_3287    | III.8               | ---, transmembrane transport protein                           |
| SACE_6486    | III.8               | purK, phosphoribosylaminoimidazole carboxylase ATPase subunit  |
| SACE_2095    | IV.1                | ---, hypothetical protein                                      |
| SACE_6783    | IV.1                | ---, hypothetical protein                                      |
| SACE_6285    | IV.1                | atpE, ATP synthase C chain                                     |
| SACE_4464    | IV.1                | ---, hypothetical protein                                      |
| SACE_1336    | IV.1                | ---, hypothetical protein                                      |
| SACE_5280    | IV.1                | rpml, 50S ribosomal protein L35                                |
| SACE_5760    | IV.1                | ---, hypothetical protein                                      |
| SACE_4726    | IV.1                | ---, hypothetical protein                                      |
| SACE_0614    | IV.1                | ---, hypothetical protein                                      |
| SACE_6682    | IV.1                | ---, DedA-like protein                                         |
| SACE_1086    | IV.1                | ---, hypothetical protein                                      |
| SACE_7395    | IV.1                | ytjA, hypothetical protein                                     |
| SACE_2088    | IV.1                | ---, putative cytoplasmic protein                              |
| SACE_1703    | IV.1                | ---, hypothetical protein                                      |
| SACE_2491    | IV.1                | ---, hypothetical protein                                      |
| SACE_3743    | IV.1                | ---, integral membrane protein                                 |

|           |      |                                           |
|-----------|------|-------------------------------------------|
| SACE_0039 | IV.1 | ---, hypothetical protein                 |
| SACE_0213 | IV.1 | ---, hypothetical protein                 |
| SACE_0212 | IV.1 | ---, hypothetical protein                 |
| SACE_6807 | IV.1 | rpmJ, 50S ribosomal protein L36           |
| SACE_5130 | IV.1 | ---, DNA methylase                        |
| SACE_3200 | IV.1 | ---, hypothetical protein                 |
| SACE_2539 | IV.1 | ---, hypothetical protein                 |
| SACE_3204 | IV.1 | ---, calcium binding protein              |
| SACE_3237 | IV.1 | ---, integral membrane protein            |
| SACE_5652 | IV.1 | ---, integral membrane protein            |
| SACE_4834 | IV.1 | ---, hypothetical protein                 |
| SACE_6374 | IV.1 | stiI, protease inhibitor precursor        |
| SACE_7105 | IV.1 | ---, hypothetical protein                 |
| SACE_6463 | IV.2 | ---, integral membrane regulatory protein |
| SACE_3818 | IV.2 | ---, protein of unknown function DUF81    |
| SACE_1204 | IV.2 | ---, Mov34/MPN/PAD-1                      |
| SACE_6102 | IV.2 | ---, protein of unknown function DUF177   |

**Table S10.** Phase b: 117 differentially expressed genes belonging to cluster 5 (down-regulated in rif 1 and rif 6).

| Probe-set ID | Functional category | Gene name and Product description                            |
|--------------|---------------------|--------------------------------------------------------------|
| SACE_5830    | I.1                 | ---, cell division initiation protein                        |
| SACE_4937    | I.3                 | ---, mandelate racemase/starvation sensing protein           |
| SACE_0675    | I.3                 | ---, lysozyme M1 precursor                                   |
| SACE_0314    | I.3                 | pon1, penicillin binding protein (class A)                   |
| SACE_7138    | I.3                 | ---, lysozyme M1 precursor                                   |
| SACE_2202    | I.4                 | ---, carboxylpeptidase                                       |
| SACE_1912    | I.6                 | aprA, putative alkaline serine protease                      |
| SACE_2246    | I.6                 | ---, vesicle-fusing ATPase                                   |
| SACE_6336    | I.7                 | ---, hypothetical protein                                    |
| SACE_6393    | II.11               | ssfR, IclR-family transcriptional regulator                  |
| SACE_4934    | II.11               | ---, AraC family transcriptional regulator                   |
| SACE_0525    | II.11               | ---, cold-shock DNA-binding domain protein                   |
| SACE_7280    | II.11               | xylR, transcriptional regulator, ROK family                  |
| SACE_2008    | II.12               | fusA2, elongation factor EF-G                                |
| SACE_5297    | II.12               | ---, hypothetical protein                                    |
| SACE_6871    | II.12               | rplK, 50S ribosomal protein L11                              |
| SACE_6443    | II.12               | ---, S30AE family protein                                    |
| SACE_6885    | III.1               | ---, amidinotransferase                                      |
| SACE_2689    | III.1               | trpE, anthranilate synthase component I                      |
| SACE_5858    | III.1               | ilvD5, dihydroxy-acid dehydratase                            |
| SACE_0905    | III.1               | hpd3, 4-hydroxyphenylpyruvate dioxygenase                    |
| SACE_0784    | III.1               | lat, L-lysine-epsilon aminotransferase                       |
| SACE_4939    | III.1               | idnD, putative zinc-binding alcohol dehydrogenase            |
| SACE_0845    | III.1               | ---, putative peptide ABC transporter, permease component    |
| SACE_5883    | III.1               | ---, probable amino-acid acetyltransferase                   |
| SACE_3485    | III.1               | ureC, urease alpha subunit                                   |
| SACE_1746    | III.1               | ---, putative glutamate ABC transporter ATP-binding protein  |
| SACE_1745    | III.1               | gluB1, putative glutamate binding protein                    |
| SACE_3873    | III.1               | dghA, glutamate dehydrogenase (NAD(P)+)                      |
| SACE_3033    | III.10              | ---, putative peptide monooxygenase                          |
| SACE_1883    | III.2               | ---, binding protein/LacI transcriptional regulator          |
| SACE_4938    | III.2               | ydfJ, putative membrane transport protein                    |
| SACE_0949    | III.2               | ---, carbohydrate kinase, FGGY                               |
| SACE_4940    | III.2               | ---, fructuronate reductase                                  |
| SACE_0941    | III.2               | rbsA, ribose transport ATP-binding protein                   |
| SACE_3487    | III.2               | ---, general substrate transporter                           |
| SACE_0948    | III.2               | ---, L-fucose isomerase, putative                            |
| SACE_7279    | III.2               | ---, putative extracellular solute-binding lipoprotein       |
| SACE_0943    | III.2               | ---, binding protein/LacI transcriptional regulator          |
| SACE_3717    | III.2               | ---, integral membrane transport protein                     |
| SACE_6126    | III.2               | ---, proline/betaine transporter, MFS family                 |
| SACE_4673    | III.4               | ---, aminotransferase class III                              |
| SACE_3542    | III.4               | paaK, phenylacetate-CoA ligase                               |
| SACE_4754    | III.5               | acoA, acetoin dehydrogenase E1 component, alpha subunit      |
| SACE_4260    | III.5               | lldP, lctP, L-lactate permease                               |
| SACE_4672    | III.5               | mmsA1, methylmalonate-semialdehyde dehydrogenase (acylating) |

|           |       |                                                              |
|-----------|-------|--------------------------------------------------------------|
| SACE_1170 | III.5 | sdhA1, succinate dehydrogenase flavoprotein subunit          |
| SACE_3420 | III.5 | ---, N5,N10-methylene-tetrahydromethanopterin reductase      |
| SACE_1171 | III.5 | sdhB1, succinate dehydrogenase iron-sulfur protein           |
| SACE_0536 | III.5 | ---, carbon monoxide dehydrogenase small chain               |
| SACE_4261 | III.5 | glcD, (S)-2-hydroxy-acid oxidase, subunit D                  |
| SACE_1449 | III.5 | aceA, isocitrate lyase                                       |
| SACE_4755 | III.5 | acoB, acetoin dehydrogenase, beta subunit                    |
| SACE_1456 | III.5 | mmsA2, methylmalonate-semialdehyde dehydrogenase (acylating) |
| SACE_0537 | III.5 | ---, carbon monoxide dehydrogenase large subunit             |
| SACE_6895 | III.5 | nuoH, NADH dehydrogenase I chain H                           |
| SACE_3571 | III.6 | ---, hypothetical protein                                    |
| SACE_3034 | III.6 | ---, possible ABC Fe(3+) transporter binding protein         |
| SACE_5168 | III.7 | fadE10, acyl-CoA dehydrogenase                               |
| SACE_5343 | III.7 | ---, AMP-dependent synthetase and ligase                     |
| SACE_1458 | III.7 | echA9, putative enoyl-CoA hydratase/isomerase                |
| SACE_5382 | III.7 | fadE16, acyl-CoA dehydrogenase                               |
| SACE_5992 | III.7 | ---, 1-hydroxy-2-methyl-2-(E)-butenyl 4-diphosphate synthase |
| SACE_0897 | III.7 | fadA3, acetyl-CoA acetyltransferase                          |
| SACE_6573 | III.8 | add, adenosine deaminase                                     |
| SACE_4310 | IV.1  | ---, hypothetical protein                                    |
| SACE_2698 | IV.1  | ---, putative regulatory protein                             |
| SACE_2918 | IV.1  | ---, hypothetical protein                                    |
| SACE_1392 | IV.1  | ---, hypothetical protein                                    |
| SACE_1399 | IV.1  | ---, hypothetical protein                                    |
| SACE_5747 | IV.1  | ---, hypothetical protein                                    |
| SACE_1168 | IV.1  | ---, hypothetical protein                                    |
| SACE_1397 | IV.1  | ---, hypothetical protein                                    |
| SACE_0176 | IV.1  | ---, hypothetical protein                                    |
| SACE_0767 | IV.1  | ---, hypothetical protein                                    |
| SACE_6639 | IV.1  | ---, hypothetical protein                                    |
| SACE_5363 | IV.1  | ---, hypothetical protein                                    |
| SACE_1103 | IV.1  | ---, hypothetical protein                                    |
| SACE_0177 | IV.1  | ---, transcriptional regulator, XRE family                   |
| SACE_6381 | IV.1  | ---, hypothetical protein                                    |
| SACE_1398 | IV.1  | stil, protease inhibitor precursor                           |
| SACE_1303 | IV.1  | ---, probable myosin                                         |
| SACE_0900 | IV.1  | ---, putative antigen 34 kDa family                          |
| SACE_0037 | IV.1  | ---, hypothetical protein                                    |
| SACE_0696 | IV.1  | ---, hypothetical protein                                    |
| SACE_1054 | IV.1  | ---, hypothetical protein                                    |
| SACE_0917 | IV.1  | ---, hypothetical protein                                    |
| SACE_3976 | IV.1  | ---, cyclic nucleotide-binding domain protein                |
| SACE_6426 | IV.1  | whiB1, putative transcriptional regulator (WhiB family)      |
| SACE_5738 | IV.1  | ---, hypothetical protein                                    |
| SACE_0372 | IV.1  | ---, hypothetical protein                                    |
| SACE_1393 | IV.1  | ---, hypothetical protein                                    |
| SACE_1528 | IV.1  | ---, hypothetical protein                                    |
| SACE_0033 | IV.1  | ---, hypothetical protein                                    |
| SACE_7221 | IV.1  | ---, hypothetical protein                                    |
| SACE_6519 | IV.1  | ---, PE-PGRS family protein                                  |
| SACE_0060 | IV.1  | ---, hypothetical protein                                    |
| SACE_7264 | IV.1  | ---, hypothetical protein                                    |
| SACE_3977 | IV.1  | ---, terpene synthase, metal binding domain protein          |
| SACE_3699 | IV.1  | ---, hypothetical protein                                    |

|           |      |                                                                           |
|-----------|------|---------------------------------------------------------------------------|
| SACE_3187 | IV.1 | ---, terpene synthase, metal binding domain protein                       |
| SACE_0069 | IV.1 | ---, regulator                                                            |
| SACE_7282 | IV.1 | ---, secreted hydrolase                                                   |
| SACE_6338 | IV.1 | ---, hypothetical protein                                                 |
| SACE_3372 | IV.1 | ---, hypothetical protein                                                 |
| SACE_1097 | IV.1 | ---, hypothetical protein                                                 |
| SACE_0226 | IV.1 | ---, hypothetical protein                                                 |
| SACE_0801 | IV.1 | ---, transglycosylase-like protein                                        |
| SACE_3488 | IV.2 | ---, CBS domain protein                                                   |
| SACE_6394 | IV.2 | ---, protein of unknown function DUF59                                    |
| SACE_3486 | IV.2 | ---, exoenzymes regulatory protein AepA precursor                         |
| SACE_4756 | IV.2 | acoC, acetoin dehydrogenase, dihydrolipoamide acetyltransferase component |
| SACE_6395 | IV.2 | ---, amidohydrolase 2                                                     |
| SACE_6396 | IV.2 | ---, alcohol dehydrogenase, zinc-binding                                  |
| SACE_6580 | IV.2 | ---, ABC transporter substrate-binding protein                            |
| SACE_3417 | IV.2 | ---, hydrolase                                                            |
| SACE_2699 | IV.2 | ---, alpha/beta hydrolase fold                                            |
